# Supplementary material for: Diet and general cognitive ability in the UK Biobank dataset
Source: PubMed Central journal article supplement (PMC8175590; doi:10.1038/s41598-021-91259-3), 2021-06-03
Supplement: 41598_2021_91259_MOESM1_ESM.pdf [file 41598_2021_91259_MOESM1_ESM.pdf]

## **Diet and general cognitive ability in the UK Biobank dataset**

Piril Hepsomali<sup>1,2\*</sup> & John A. Groeger<sup>3</sup>

<sup>1</sup> University of Roehampton, Department of Psychology, London, United Kingdom

<sup>2</sup> Unilever R&D, Colworth Science Park, Bedford, United Kingdom

<sup>3</sup> Nottingham Trent University, School of Social Sciences, Department of Psychology,  
Nottingham, United Kingdom

\* Correspondence concerning this article should be addressed to Piril Hepsomali,

University of Roehampton, Department of Psychology, London, United Kingdom, email:

[P.Hepsomali@roehampton.ac.uk](mailto:P.Hepsomali@roehampton.ac.uk)

## Supplementary File

### 1. ANOVA and Bonferroni Post Hoc Tests for Baseline Characteristics

#### 1.1. Age

|                | Sum of Squares | df    | Mean Square | F       | Sig. |
|----------------|----------------|-------|-------------|---------|------|
| Between Groups | 2292.737       | 5     | 458.547     | 482.600 | .000 |
| Within Groups  | 46102.744      | 48521 | .950        |         |      |
| Total          | 48395.481      | 48526 |             |         |      |

| (I) age_cat | (J) age_cat | Mean Difference (I-J) | Std. Error | Sig. | 95% Confidence Interval |             |
|-------------|-------------|-----------------------|------------|------|-------------------------|-------------|
|             |             |                       |            |      | Lower Bound             | Upper Bound |
| 40-44       | 45-49       | .11193748*            | .01809497  | .000 | .0588225                | .1650524    |
|             | 50-54       | .18765688*            | .01741741  | .000 | .1365308                | .2387830    |
|             | 55-59       | .22396971*            | .01675627  | .000 | .1747843                | .2731551    |
|             | 60-64       | .41744937*            | .01568988  | .000 | .3713942                | .4635046    |
|             | 65+         | .67604921*            | .01657124  | .000 | .6274069                | .7246915    |
| 45-49       | 40-44       | -.11193748*           | .01809497  | .000 | -.1650524               | -.0588225   |
|             | 50-54       | .07571940*            | .01710726  | .000 | .0255037                | .1259351    |
|             | 55-59       | .11203223*            | .01643365  | .000 | .0637938                | .1602707    |
|             | 60-64       | .30551189*            | .01534486  | .000 | .2604694                | .3505543    |
|             | 65+         | .56411173*            | .01624495  | .000 | .5164272                | .6117963    |
| 50-54       | 40-44       | -.18765688*           | .01741741  | .000 | -.2387830               | -.1365308   |
|             | 45-49       | -.07571940*           | .01710726  | .000 | -.1259351               | -.0255037   |
|             | 55-59       | .03631283             | .01568449  | .309 | -.0097265               | .0823522    |
|             | 60-64       | .22979249*            | .01453970  | .000 | .1871134                | .2724715    |
|             | 65+         | .48839233*            | .01548666  | .000 | .4429337                | .5338510    |
| 55-59       | 40-44       | -.22396971*           | .01675627  | .000 | -.2731551               | -.1747843   |
|             | 45-49       | -.11203223*           | .01643365  | .000 | -.1602707               | -.0637938   |
|             | 50-54       | -.03631283            | .01568449  | .309 | -.0823522               | .0097265    |
|             | 60-64       | .19347966*            | .01374079  | .000 | .1531457                | .2338136    |
|             | 65+         | .45207950*            | .01473916  | .000 | .4088150                | .4953440    |
| 60-64       | 40-44       | -.41744937*           | .01568988  | .000 | -.4635046               | -.3713942   |
|             | 45-49       | -.30551189*           | .01534486  | .000 | -.3505543               | -.2604694   |
|             | 50-54       | -.22979249*           | .01453970  | .000 | -.2724715               | -.1871134   |
|             | 55-59       | -.19347966*           | .01374079  | .000 | -.2338136               | -.1531457   |
|             | 65+         | .25859984*            | .01351454  | .000 | .2189300                | .2982697    |
| 65+         | 40-44       | -.67604921*           | .01657124  | .000 | -.7246915               | -.6274069   |
|             | 45-49       | -.56411173*           | .01624495  | .000 | -.6117963               | -.5164272   |
|             | 50-54       | -.48839233*           | .01548666  | .000 | -.5338510               | -.4429337   |
|             | 55-59       | -.45207950*           | .01473916  | .000 | -.4953440               | -.4088150   |
|             | 60-64       | -.25859984*           | .01351454  | .000 | -.2982697               | -.2189300   |

\*. The mean difference is significant at the 0.05 level.

## 1.2. BMI

|                | Sum of Squares | df    | Mean Square | F      | Sig. |
|----------------|----------------|-------|-------------|--------|------|
| Between Groups | 218.335        | 3     | 72.778      | 73.306 | .000 |
| Within Groups  | 48230.008      | 48580 | .993        |        |      |
| Total          | 48448.343      | 48583 |             |        |      |

| (I) BMIcat | (J) BMIcat | Mean Difference |            |       | 95% Confidence Interval |             |
|------------|------------|-----------------|------------|-------|-------------------------|-------------|
|            |            | (I-J)           | Std. Error | Sig.  | Lower Bound             | Upper Bound |
| <18.5      | 18.5-25    | -.23419018*     | .06574411  | .002  | -.4076472               | -.0607332   |
|            | 25-30      | -.14825920      | .06564684  | .144  | -.3214596               | .0249412    |
|            | 30+        | -.05802860      | .06592050  | 1.000 | -.2319510               | .1158938    |
| 18.5-25    | <18.5      | .23419018*      | .06574411  | .002  | .0607332                | .4076472    |
|            | 25-30      | .08593098*      | .01048553  | .000  | .0582663                | .1135956    |
|            | 30+        | .17616158*      | .01208098  | .000  | .1442875                | .2080356    |
| 25-30      | <18.5      | .14825920       | .06564684  | .144  | -.0249412               | .3214596    |
|            | 18.5-25    | -.08593098*     | .01048553  | .000  | -.1135956               | -.0582663   |
|            | 30+        | .09023060*      | .01153993  | .000  | .0597841                | .1206771    |
| 30+        | <18.5      | .05802860       | .06592050  | 1.000 | -.1158938               | .2319510    |
|            | 18.5-25    | -.17616158*     | .01208098  | .000  | -.2080356               | -.1442875   |
|            | 25-30      | -.09023060*     | .01153993  | .000  | -.1206771               | -.0597841   |

\*. The mean difference is significant at the 0.05 level.

### 1.3. Deprivation

|                | Sum of Squares | df    | Mean Square | F       | Sig. |
|----------------|----------------|-------|-------------|---------|------|
| Between Groups | 757.401        | 4     | 189.350     | 192.351 | .000 |
| Within Groups  | 47864.597      | 48623 | .984        |         |      |
| Total          | 48621.998      | 48627 |             |         |      |

| (I) Percentile Group<br>of Deprivation_Index | (J) Percentile<br>Group of<br>Deprivation_Index | Mean<br>Difference (I-<br>J) | Std. Error | Sig. | 95% Confidence Interval |             |
|----------------------------------------------|-------------------------------------------------|------------------------------|------------|------|-------------------------|-------------|
|                                              |                                                 |                              |            |      | Lower Bound             | Upper Bound |
| 1 (most affluent)                            | 2                                               | .05272512*                   | .01418897  | .002 | .0128944                | .0925559    |
|                                              | 3                                               | .10472984*                   | .01417646  | .000 | .0649342                | .1445255    |
|                                              | 4                                               | .13876536*                   | .01447582  | .000 | .0981294                | .1794013    |
|                                              | 5                                               | .39467813*                   | .01551672  | .000 | .3511202                | .4382361    |
| 2                                            | 1                                               | -.05272512*                  | .01418897  | .002 | -.0925559               | -.0128944   |
|                                              | 3                                               | .05200472*                   | .01334875  | .001 | .0145326                | .0894768    |
|                                              | 4                                               | .08604024*                   | .01366626  | .000 | .0476768                | .1244036    |
|                                              | 5                                               | .34195301*                   | .01476434  | .000 | .3005071                | .3833989    |
| 3                                            | 1                                               | -.10472984*                  | .01417646  | .000 | -.1445255               | -.0649342   |
|                                              | 2                                               | -.05200472*                  | .01334875  | .001 | -.0894768               | -.0145326   |
|                                              | 4                                               | .03403552                    | .01365327  | .127 | -.0042914               | .0723625    |
|                                              | 5                                               | .28994829*                   | .01475232  | .000 | .2485361                | .3313604    |
| 4                                            | 1                                               | -.13876536*                  | .01447582  | .000 | -.1794013               | -.0981294   |
|                                              | 2                                               | -.08604024*                  | .01366626  | .000 | -.1244036               | -.0476768   |
|                                              | 3                                               | -.03403552                   | .01365327  | .127 | -.0723625               | .0042914    |
|                                              | 5                                               | .25591277*                   | .01504022  | .000 | .2136924                | .2981331    |
| 5 (least affluent)                           | 1                                               | -.39467813*                  | .01551672  | .000 | -.4382361               | -.3511202   |
|                                              | 2                                               | -.34195301*                  | .01476434  | .000 | -.3833989               | -.3005071   |
|                                              | 3                                               | -.28994829*                  | .01475232  | .000 | -.3313604               | -.2485361   |
|                                              | 4                                               | -.25591277*                  | .01504022  | .000 | -.2981331               | -.2136924   |

\*. The mean difference is significant at the 0.05 level.

## 1.4. Employment

|                | Sum of Squares | df    | Mean Square | F       | Sig. |
|----------------|----------------|-------|-------------|---------|------|
| Between Groups | 1833.956       | 6     | 305.659     | 318.502 | .000 |
| Within Groups  | 46402.331      | 48352 | .960        |         |      |
| Total          | 48236.288      | 48358 |             |         |      |

| (I)                                              |                                                  | 95% Confidence Interval |            |       |             |             |
|--------------------------------------------------|--------------------------------------------------|-------------------------|------------|-------|-------------|-------------|
| current_employ                                   | Mean Difference                                  |                         |            |       |             |             |
| ent_status                                       | (J) current_employment_status                    | (I-J)                   | Std. Error | Sig.  | Lower Bound | Upper Bound |
| In paid employment or self-employed              | retired                                          | .37155279*              | .00959198  | .000  | .3424101    | .4006955    |
|                                                  | Looking after home and/or family                 | .18469013*              | .02629452  | .000  | .1048012    | .2645791    |
|                                                  | Unable to work because of sickness or disability | .67742166*              | .02697954  | .000  | .5954515    | .7593918    |
|                                                  | unemployed                                       | .24628006*              | .03313236  | .000  | .1456161    | .3469440    |
|                                                  | Doing unpaid or voluntary work                   | .14650350               | .06785927  | .648  | -.0596689   | .3526759    |
|                                                  | full_part_time_student                           | .13946858               | .08330152  | 1.000 | -.1136210   | .3925582    |
| retired                                          | In paid employment or self-employed              | -.37155279*             | .00959198  | .000  | -.4006955   | -.3424101   |
|                                                  | Looking after home and/or family                 | -.18686266*             | .02671016  | .000  | -.2680144   | -.1057109   |
|                                                  | Unable to work because of sickness or disability | .30586887*              | .02738479  | .000  | .2226675    | .3890703    |
|                                                  | unemployed                                       | -.12527273*             | .03346318  | .004  | -.2269417   | -.0236037   |
|                                                  | Doing unpaid or voluntary work                   | -.22504929*             | .06802141  | .020  | -.4317143   | -.0183843   |
|                                                  | full_part_time_student                           | -.23208421              | .08343365  | .114  | -.4855752   | .0214068    |
| Looking after home and/or family                 | In paid employment or self-employed              | -.18469013*             | .02629452  | .000  | -.2645791   | -.1048012   |
|                                                  | retired                                          | .18686266*              | .02671016  | .000  | .1057109    | .2680144    |
|                                                  | Unable to work because of sickness or disability | .49273153*              | .03673312  | .000  | .3811277    | .6043354    |
|                                                  | unemployed                                       | .06158993               | .04146300  | 1.000 | -.0643844   | .1875643    |
|                                                  | Doing unpaid or voluntary work                   | -.03818663              | .07229321  | 1.000 | -.2578304   | .1814571    |
|                                                  | full_part_time_student                           | -.04522155              | .08695154  | 1.000 | -.3094007   | .2189577    |
| Unable to work because of sickness or disability | In paid employment or self-employed              | -.67742166*             | .02697954  | .000  | -.7593918   | -.5954515   |
|                                                  | retired                                          | -.30586887*             | .02738479  | .000  | -.3890703   | -.2226675   |
|                                                  | Looking after home and/or family                 | -.49273153*             | .03673312  | .000  | -.6043354   | -.3811277   |
|                                                  | unemployed                                       | -.43114160*             | .04190076  | .000  | -.5584460   | -.3038372   |
|                                                  | Doing unpaid or voluntary work                   | -.53091815*             | .07254517  | .000  | -.7513274   | -.3105089   |
|                                                  | full_part_time_student                           | -.53795307*             | .08716113  | .000  | -.8027691   | -.2731371   |
| unemployed                                       | In paid employment or self-employed              | -.24628006*             | .03313236  | .000  | -.3469440   | -.1456161   |

|                                |                                                  |            |           |       |           |          |
|--------------------------------|--------------------------------------------------|------------|-----------|-------|-----------|----------|
|                                | retired                                          | .12527273* | .03346318 | .004  | .0236037  | .2269417 |
|                                | Looking after home and/or family                 | -.06158993 | .04146300 | 1.000 | -.1875643 | .0643844 |
|                                | Unable to work because of sickness or disability | .43114160* | .04190076 | .000  | .3038372  | .5584460 |
|                                | Doing unpaid or voluntary work                   | -.09977656 | .07505104 | 1.000 | -.3277993 | .1282462 |
|                                | full_part_time_student                           | -.10681148 | .08925761 | 1.000 | -.3779971 | .1643741 |
| Doing unpaid or voluntary work | In paid employment or self-employed              | -.14650350 | .06785927 | .648  | -.3526759 | .0596689 |
|                                | retired                                          | .22504929* | .06802141 | .020  | .0183843  | .4317143 |
|                                | Looking after home and/or family                 | .03818663  | .07229321 | 1.000 | -.1814571 | .2578304 |
|                                | Unable to work because of sickness or disability | .53091815* | .07254517 | .000  | .3105089  | .7513274 |
|                                | unemployed                                       | .09977656  | .07505104 | 1.000 | -.1282462 | .3277993 |
|                                | full_part_time_student                           | -.00703492 | .10711699 | 1.000 | -.3324815 | .3184117 |
| full_part_time_student         | In paid employment or self-employed              | -.13946858 | .08330152 | 1.000 | -.3925582 | .1136210 |
|                                | retired                                          | .23208421  | .08343365 | .114  | -.0214068 | .4855752 |
|                                | Looking after home and/or family                 | .04522155  | .08695154 | 1.000 | -.2189577 | .3094007 |
|                                | Unable to work because of sickness or disability | .53795307* | .08716113 | .000  | .2731371  | .8027691 |
|                                | unemployed                                       | .10681148  | .08925761 | 1.000 | -.1643741 | .3779971 |
|                                | Doing unpaid or voluntary work                   | .00703492  | .10711699 | 1.000 | -.3184117 | .3324815 |

\*. The mean difference is significant at the 0.05 level.

## 1.5. Qualifications

|                | Sum of Squares | df    | Mean Square | F       | Sig. |
|----------------|----------------|-------|-------------|---------|------|
| Between Groups | 2736.338       | 5     | 547.268     | 689.049 | .000 |
| Within Groups  | 32759.860      | 41247 | .794        |         |      |
| Total          | 35496.199      | 41252 |             |         |      |

| (I) qualifications               | (J) qualifications                                      | Mean Difference (I-J) | Std. Error | Sig. | 95% Confidence Interval |             |
|----------------------------------|---------------------------------------------------------|-----------------------|------------|------|-------------------------|-------------|
|                                  |                                                         |                       |            |      | Lower Bound             | Upper Bound |
| College or University degree     | A levels/AS levels or equivalent                        | .10236208*            | .01395588  | .000 | .0613964                | .1433278    |
|                                  | O levels/GCSEs or equivalent                            | .34869429*            | .01107412  | .000 | .3161876                | .3812009    |
|                                  | CSEs or equivalent                                      | .69378482*            | .01785222  | .000 | .6413820                | .7461877    |
|                                  | NVQ or HND or HNC or equivalent                         | .69979891*            | .01686505  | .000 | .6502937                | .7493041    |
|                                  | Other professional qualifications eg: nursing, teaching | .56123816*            | .01862112  | .000 | .5065783                | .6158981    |
| A levels/AS levels or equivalent | College or University degree                            | -.10236208*           | .01395588  | .000 | -.1433278               | -.0613964   |
|                                  | O levels/GCSEs or equivalent                            | .24633221*            | .01468811  | .000 | .2032172                | .2894473    |
|                                  | CSEs or equivalent                                      | .59142274*            | .02029301  | .000 | .5318553                | .6509902    |
|                                  | NVQ or HND or HNC or equivalent                         | .59743682*            | .01943024  | .000 | .5404019                | .6544718    |
|                                  | Other professional qualifications eg: nursing, teaching | .45887608*            | .02097262  | .000 | .3973137                | .5204385    |
| O levels/GCSEs or equivalent     | College or University degree                            | -.34869429*           | .01107412  | .000 | -.3812009               | -.3161876   |
|                                  | A levels/AS levels or equivalent                        | -.24633221*           | .01468811  | .000 | -.2894473               | -.2032172   |
|                                  | CSEs or equivalent                                      | .34509053*            | .01843029  | .000 | .2909908                | .3991903    |
|                                  | NVQ or HND or HNC or equivalent                         | .35110461*            | .01747581  | .000 | .2998066                | .4024026    |
|                                  | Other professional qualifications eg: nursing, teaching | .21254387*            | .01917603  | .000 | .1562551                | .2688326    |
| CSEs or equivalent               | College or University degree                            | -.69378482*           | .01785222  | .000 | -.7461877               | -.6413820   |

|                                                         |                                                         |             |           |       |           |           |
|---------------------------------------------------------|---------------------------------------------------------|-------------|-----------|-------|-----------|-----------|
|                                                         | A levels/AS levels or equivalent                        | -.59142274* | .02029301 | .000  | -.6509902 | -.5318553 |
|                                                         | O levels/GCSEs or equivalent                            | -.34509053* | .01843029 | .000  | -.3991903 | -.2909908 |
|                                                         | NVQ or HND or HNC or equivalent                         | .00601409   | .02239351 | 1.000 | -.0597192 | .0717473  |
|                                                         | Other professional qualifications eg: nursing, teaching | -.13254666* | .02374417 | .000  | -.2022446 | -.0628487 |
| NVQ or HND or HNC or equivalent                         | College or University degree                            | -.69979891* | .01686505 | .000  | -.7493041 | -.6502937 |
|                                                         | A levels/AS levels or equivalent                        | -.59743682* | .01943024 | .000  | -.6544718 | -.5404019 |
|                                                         | O levels/GCSEs or equivalent                            | -.35110461* | .01747581 | .000  | -.4024026 | -.2998066 |
|                                                         | CSEs or equivalent                                      | -.00601409  | .02239351 | 1.000 | -.0717473 | .0597192  |
|                                                         | Other professional qualifications eg: nursing, teaching | -.13856075* | .02301117 | .000  | -.2061071 | -.0710144 |
| Other professional qualifications eg: nursing, teaching | College or University degree                            | -.56123816* | .01862112 | .000  | -.6158981 | -.5065783 |
|                                                         | A levels/AS levels or equivalent                        | -.45887608* | .02097262 | .000  | -.5204385 | -.3973137 |
|                                                         | O levels/GCSEs or equivalent                            | -.21254387* | .01917603 | .000  | -.2688326 | -.1562551 |
|                                                         | CSEs or equivalent                                      | .13254666*  | .02374417 | .000  | .0628487  | .2022446  |
|                                                         | NVQ or HND or HNC or equivalent                         | .13856075*  | .02301117 | .000  | .0710144  | .2061071  |

\*. The mean difference is significant at the 0.05 level.



## 1.6. Income

|                | Sum of Squares | df    | Mean Square | F        | Sig. |
|----------------|----------------|-------|-------------|----------|------|
| Between Groups | 3733.312       | 4     | 933.328     | 1079.785 | .000 |
| Within Groups  | 36579.055      | 42319 | .864        |          |      |
| Total          | 40312.367      | 42323 |             |          |      |

| (I)                  |                            |                       |            |      | 95% Confidence Interval |             |
|----------------------|----------------------------|-----------------------|------------|------|-------------------------|-------------|
| total_household      |                            |                       |            |      |                         |             |
| _income              | (J) total_household_income | Mean Difference (I-J) | Std. Error | Sig. | Lower Bound             | Upper Bound |
| Less than 18,000     | 18,000 to 30,999           | -.31202669*           | .01300009  | .000 | -.3485203               | -.2755331   |
|                      | 31,000 to 51,999           | -.58781591*           | .01293853  | .000 | -.6241367               | -.5514951   |
|                      | 52,000 to 100,000          | -.78680087*           | .01394462  | .000 | -.8259459               | -.7476558   |
|                      | Greater than 100,000       | -.93084568*           | .02325550  | .000 | -.9961281               | -.8655633   |
| 18,000 to 30,999     | Less than 18,000           | .31202669*            | .01300009  | .000 | .2755331                | .3485203    |
|                      | 31,000 to 51,999           | -.27578921*           | .01238061  | .000 | -.3105438               | -.2410346   |
|                      | 52,000 to 100,000          | -.47477418*           | .01342857  | .000 | -.5124706               | -.4370778   |
|                      | Greater than 100,000       | -.61881899*           | .02294978  | .000 | -.6832432               | -.5543948   |
| 31,000 to 51,999     | Less than 18,000           | .58781591*            | .01293853  | .000 | .5514951                | .6241367    |
|                      | 18,000 to 30,999           | .27578921*            | .01238061  | .000 | .2410346                | .3105438    |
|                      | 52,000 to 100,000          | -.19898497*           | .01336898  | .000 | -.2365141               | -.1614558   |
|                      | Greater than 100,000       | -.34302978*           | .02291496  | .000 | -.4073562               | -.2787033   |
| 52,000 to 100,000    | Less than 18,000           | .78680087*            | .01394462  | .000 | .7476558                | .8259459    |
|                      | 18,000 to 30,999           | .47477418*            | .01342857  | .000 | .4370778                | .5124706    |
|                      | 31,000 to 51,999           | .19898497*            | .01336898  | .000 | .1614558                | .2365141    |
|                      | Greater than 100,000       | -.14404481*           | .02349771  | .000 | -.2100071               | -.0780825   |
| Greater than 100,000 | Less than 18,000           | .93084568*            | .02325550  | .000 | .8655633                | .9961281    |
|                      | 18,000 to 30,999           | .61881899*            | .02294978  | .000 | .5543948                | .6832432    |
|                      | 31,000 to 51,999           | .34302978*            | .02291496  | .000 | .2787033                | .4073562    |
|                      | 52,000 to 100,000          | .14404481*            | .02349771  | .000 | .0780825                | .2100071    |

\*. The mean difference is significant at the 0.05 level.

## 2. Further Controlling for Qualifications and Income

To quantify the associations between diet and cognitive performance, a linear regression analysis (further adjusted by qualifications and income) was performed. We also conducted separate univariate ANCOVA tests (further adjusted by qualifications and income) on general cognitive ability and (i) partial fibre intake, and (ii) milk intake associations.

### 2.1. Regression Analysis for General Cognitive Ability Score (Model 3)

Table 2.1.1. Regression Analysis for General Cognitive Ability Score (further adjusted for qualifications and income)

|                             | <i>B</i> | <i>SE</i> | $\beta$ | <i>95% CI</i>    | <i>p</i> |
|-----------------------------|----------|-----------|---------|------------------|----------|
| (Constant)                  | 0.784    | 0.047     |         | [0.692, 0.876]   | 0.000    |
| Age                         | -0.009   | 0.001     | -0.084  | [-0.010, -0.008] | 0.000    |
| Sex (F=0/M=1)               | 0.134    | 0.010     | 0.073   | [0.115, 0.153]   | 0.000    |
| BMI                         | -0.003   | 0.001     | -0.017  | [-0.005, -0.001] | 0.001    |
| Qualifications              | -0.125   | 0.003     | -0.213  | [-0.131, -0.119] | 0.000    |
| Income                      | 0.124    | 0.004     | 0.156   | [0.116, 0.133]   | 0.000    |
| Vegetable intake            | -0.015   | 0.001     | -0.054  | [-0.018, -0.012] | 0.000    |
| Fruit intake                | -0.012   | 0.002     | -0.033  | [-0.016, -0.008] | 0.000    |
| Fish intake                 | -0.002   | 0.003     | -0.004  | [-0.009, 0.004]  | 0.487    |
| Unprocessed red meat intake | 0.011    | 0.003     | 0.021   | [0.005, 0.017]   | 0.000    |
| Processed meat intake       | 0.038    | 0.005     | 0.044   | [0.028, 0.047]   | 0.000    |

$F(10, 35712) = 498.18, p < .0001, R^2 = .122$

Tolerance range: 0.78 – 0.96; VIF range: 1.04- 1.29

### 2.2. Impact of Qualifications and Income on Healthy Diet Score and General Cognitive Ability Association

After further adjustments, ANCOVA revealed a significant association between healthy diet score and general cognitive ability,  $F(6, 36595) = 21.94, p < .001, \eta^2 = .004$  (please see (i) Table 2.2.1 for means(se), (ii) Table 2.2.2 for post hoc test results, and (iii) Supplementary Figure 1A for a graphical representation of the results).

Table 2.2.1. General Cognitive Ability Score across Healthy Diet Scores (further adjusted for qualifications and income)

| Healthy Diet Score | <i>N</i> | <i>Mean adj. (SE)</i> |
|--------------------|----------|-----------------------|
| 0 (Lowest)         | 4394     | 0.23 (0.01)           |
| 1 (Low)            | 12098    | 0.22 (0.01)           |
| 2 (Low/medium)     | 11001    | 0.18 (0.01)           |
| 3 (Medium)         | 6082     | 0.11 (0.01)           |
| 4 (Medium/high)    | 2406     | 0.07 (0.02)           |
| 5 (High)           | 555      | 0.12 (0.04)           |
| 6 (Highest)        | 71       | -0.05 (0.10)          |

Table 2.2.2. Posthoc Comparisons for Covariate Adjusted Analyses Using Bonferroni. Mean differences (column-rows) shown. \* shows mean difference is significant at the 0.05 level.

|                 | Healthy Diet Score |     |      |      |      |      |     |
|-----------------|--------------------|-----|------|------|------|------|-----|
|                 | 0                  | 1   | 2    | 3    | 4    | 5    | 6   |
| 0 (Lowest)      | 1                  | .01 | .06* | .13* | .16* | .11  | .28 |
| 1 (Low)         |                    | 1   | .47* | .12  | .12* | .10  | .27 |
| 2 (Low/medium)  |                    |     | 1    | .07* | .10* | .06  | .22 |
| 3 (Medium)      |                    |     |      | 1    | .03  | -.01 | .15 |
| 4 (Medium/high) |                    |     |      |      | 1    | -.05 | .12 |
| 5 (High)        |                    |     |      |      |      | 1    | .16 |
| 6 (Highest)     |                    |     |      |      |      |      | 1   |

### 2.3. Impact of Qualifications and Income on Partial Fibre Score and General Cognitive Ability Association

The association between partial fibre intake score and general cognitive ability remained significant after further controlling for qualifications and income,  $F(4, 36601) = 22.19, p < .001, \eta^2 = .002$  (please see (i) Table 2.3.1 for means(se), (ii) Table 2.3.2 for post hoc test results, and (iii) Supplementary Figure 1B for a graphical representation of the results).

Table 2.3.1. General Cognitive Ability Score across Partial Fibre Intake Groups (further adjusted for qualifications and income)

| Partial Fibre Intake Groups | <i>N</i> | <i>Mean adj. (SE)</i> |
|-----------------------------|----------|-----------------------|
| Low                         | 6456     | 0.20 (0.01)           |
| Low/medium                  | 7392     | 0.20 (0.01)           |
| Medium                      | 7484     | 0.21 (0.01)           |
| Medium/high                 | 7677     | 0.19 (0.01)           |
| High                        | 7592     | 0.10 (0.01)           |

Table 2.3.2. Posthoc Comparisons Adjusted (Groups (further adjusted for qualifications and income) Analyses Using Bonferroni. Mean differences (column-rows) shown. \* shows mean difference is significant at the 0.05 level.

|                | Partial Fibre Groups |      |      |     |      |
|----------------|----------------------|------|------|-----|------|
|                | 1                    | 2    | 3    | 4   | 5    |
| 1. Low         | 1                    | -.01 | -.02 | .01 | .10* |
| 2. Low/medium  |                      | 1    | -.01 | .01 | .11* |
| 3. Medium      |                      |      | 1    | .03 | .12* |
| 4. Medium/high |                      |      |      | 1   | .09* |
| 5. High        |                      |      |      |     | 1    |

## 2.4. Impact of Qualifications and Income on Milk Intake and General Cognitive Ability Association

This analysis also revealed a significant association between milk intake and general cognitive ability,  $F(4, 35424) = 7.45, p < .001, \eta^2 = .001$  (please see (i) Table 2.4.1 for means(se), (ii) Table 2.4.2 for post hoc test results, and (iii) Supplementary Figure 1C for a graphical representation of the results).

Table 2.4.1. General Cognitive Ability Score across Milk Intake Groups (further adjusted for qualifications and income)

| Milk Intake Groups | <i>N</i> | <i>Mean adj.</i><br>( <i>SE</i> ) |
|--------------------|----------|-----------------------------------|
| Low                | 6587     | 0.16 (0.01)                       |
| Low/medium         | 7423     | 0.16 (0.01)                       |
| Medium             | 7203     | 0.21 (0.01)                       |
| Medium/high        | 7292     | 0.20 (0.01)                       |
| High               | 6920     | 0.15 (0.01)                       |

Table 2.4.2. Posthoc Comparisons Adjusted (Groups (further adjusted for qualifications and income) Analyses Using Bonferroni. Mean differences (column-rows) shown. \* shows mean difference is significant at the 0.05 level.

|                | Milk Intake Groups |      |       |       |      |
|----------------|--------------------|------|-------|-------|------|
|                | 1                  | 2    | 3     | 4     | 5    |
| 1. Low         | 1                  | -.01 | -.06* | -.04* | .01  |
| 2. Low/medium  |                    | 1    | -.05* | -.03  | .01  |
| 3. Medium      |                    |      | 1     | .01   | .06* |
| 4. Medium/high |                    |      |       | 1     | .05* |
| 5. High        |                    |      |       |       | 1    |

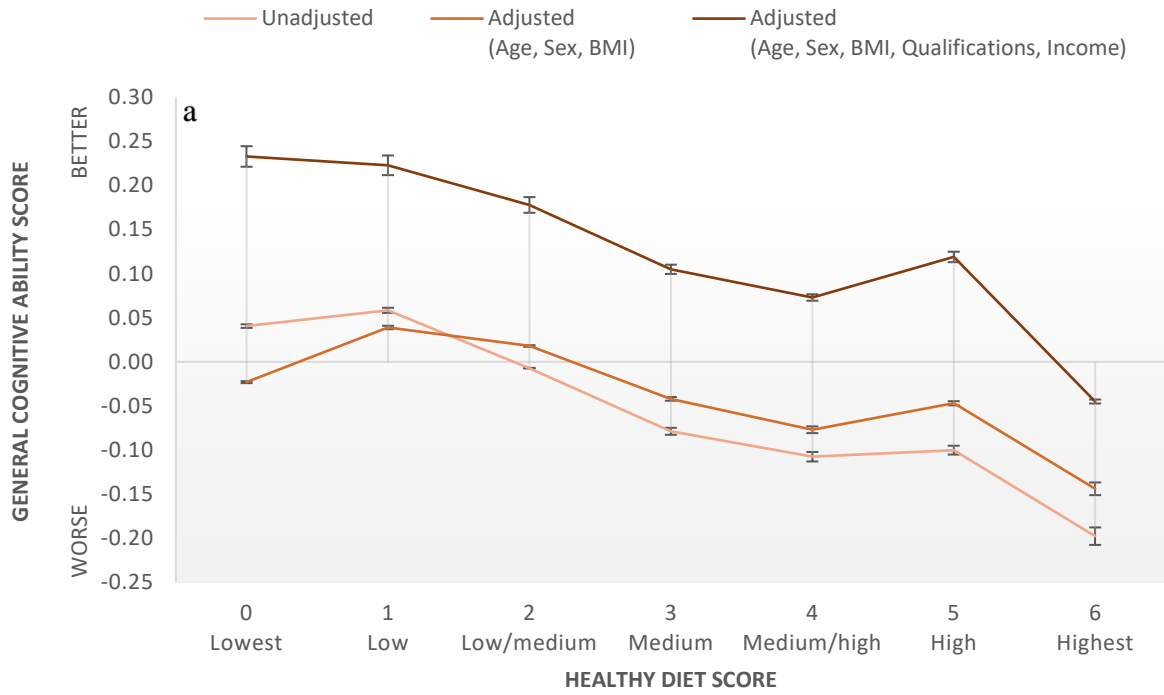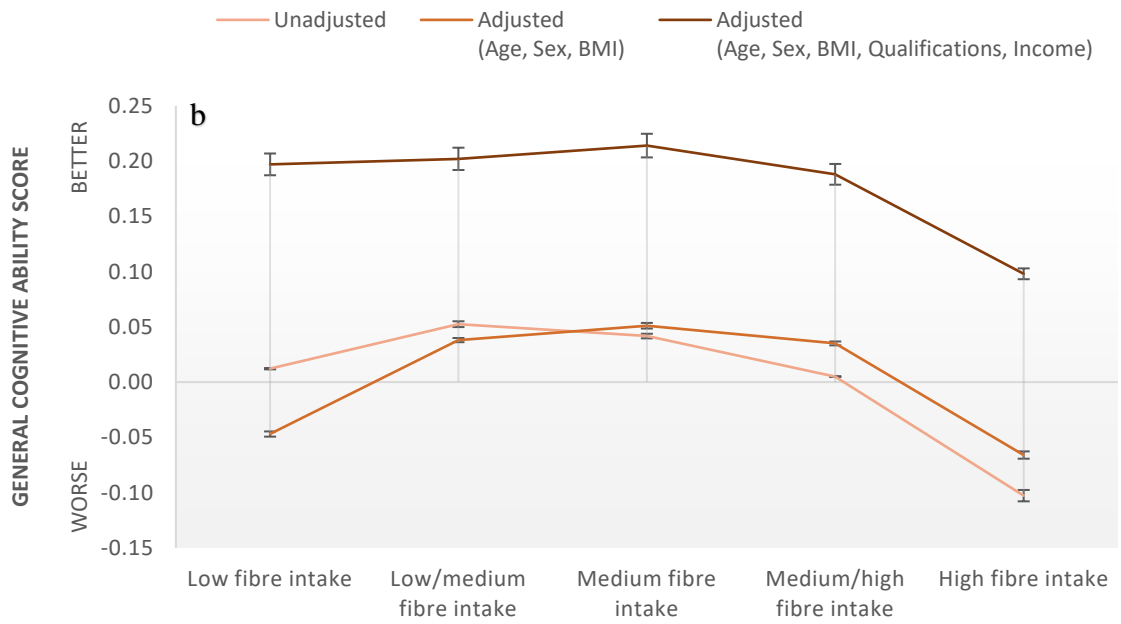

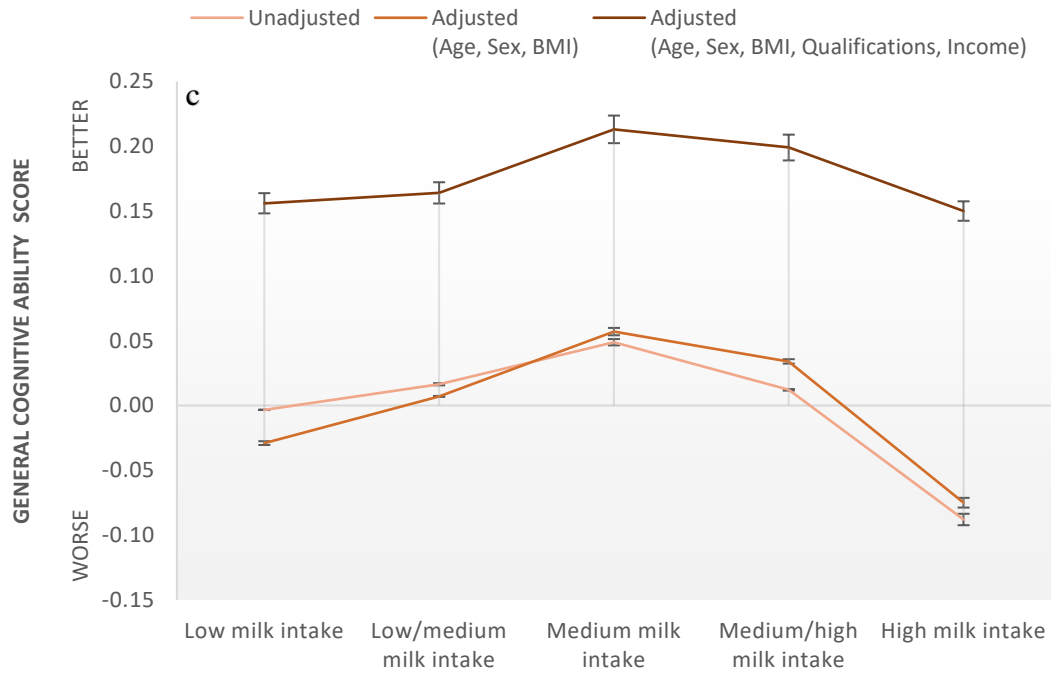

Supplementary Figure 1. Mean cognitive ability scores according to (a) healthy diet scores, (b) fibre intake groups, (c) milk intake groups (bars represent 95% CI).
